# Supplementary material for: Cement clinker precursor production in an electrolyser
Source: Royal Society of Chemistry journal article supplement (doi:10.1039/d2ee02349k), 2022-01-01
Supplement: d2ee02349k2.pdf [file d2ee02349k2.pdf]

ORANGE = manipulated parameters  
RED = selected energy/emissions outputs  
GREEN = energy generated

| Constants                      |                |
|--------------------------------|----------------|
| Faraday's constant             | 96485 C/mol    |
| Molar mass CaCO <sub>3</sub>   | 100.087 g/mol  |
| Molar mass Ca(OH) <sub>2</sub> | 74.093 g/mol   |
| Molar mass CaO                 | 56.077 g/mol   |
| Wt % CaO in clinker            | 0.65 % decimal |
| Thermal to electric efficiency | 0.5 % decimal  |

| Operating cost difference (Echem-Thermal) |                    |
|-------------------------------------------|--------------------|
| Electrochemical cement                    | 70.3 \$ / t cement |
| Thermal cement                            | 71.0 \$ / t cement |
| Difference (echem - thermal)              | -0.8 \$ / t cement |

| TARGET RATES & PLANT SPECIFICATIONS  |         |                          |
|--------------------------------------|---------|--------------------------|
| Parameter                            | Value   | Units                    |
| Cement production rate               | 40      | ton / day                |
| Clinker content in cement            | 0.95    | % decimal                |
| Ca(OH) <sub>2</sub> production       | 32.64   | ton / day                |
| CaCO <sub>3</sub> consumption        | 44.08   | ton / day                |
| Hourly CaCO <sub>3</sub> consumption | 18352.7 | mol / h                  |
| Electricity price                    | 0.030   | CAD \$ / kWh             |
| Grid emissions intensity             | 0.150   | kg CO <sub>2</sub> / kWh |
| Grid emissions intensity             | 41.67   | kg CO <sub>2</sub> / GJ  |
| Regional carbon tax                  | 85.00   | \$ / t CO <sub>2</sub>   |

| THERMAL CEMENT PRODUCTION                                        |                                      |
|------------------------------------------------------------------|--------------------------------------|
| CaCO <sub>3</sub> -fed dry rotary kiln + preheater + precalciner |                                      |
| Kiln + precalciner energy consumption                            | 2.90 GJ / t cement                   |
| Equivalent electrical energy                                     | 5.80 GJ / t cement                   |
| % coke in fuel blend                                             | 0.00 % decimal                       |
| % coal in fuel blend                                             | 0.00 % decimal                       |
| % oil in fuel blend                                              | 0.00 % decimal                       |
| % CH <sub>4</sub> in fuel blend                                  | 1.00 % decimal                       |
| % H <sub>2</sub> in fuel blend                                   | 0.00 % decimal                       |
| Fuel mix emission intensity                                      | 56.10 kg CO <sub>2</sub> / GJ        |
| Fuel cost                                                        | 4.20 \$ / GJ                         |
| Emissions intensity of kiln                                      | 162.69 kg CO <sub>2</sub> / t cement |
| Electricity demand for aux. equipment                            | 90.00 kWh / t cement                 |
| Electricity demand for aux. equipment                            | 0.32 GJ / t cement                   |

| ENERGY                              |                   |
|-------------------------------------|-------------------|
| Thermal energy consumption          | 2.9 GJ / t cement |
| Electric energy consumption         | 0.3 GJ / t cement |
| Total energy consumption (thermal)  | 3.1 GJ / t cement |
| Total energy consumption (electric) | 6.1 GJ / t cement |

| EMISSIONS                                       |                                      |
|-------------------------------------------------|--------------------------------------|
| Electricity generation for electrolyser         | 0 kg CO <sub>2</sub> / t cement      |
| CO <sub>2</sub> released from CaCO <sub>3</sub> | 484.6 kg CO <sub>2</sub> / t cement  |
| Kiln fuel use                                   | 162.7 kg CO <sub>2</sub> / t cement  |
| Electricity for aux. equipment                  | 13.5 kg CO <sub>2</sub> / t cement   |
| Total emissions                                 | 660.81 kg CO <sub>2</sub> / t cement |

| OPERATING COST      |                    |
|---------------------|--------------------|
| Electricity cost    | 2.7 \$ / t cement  |
| Thermal energy cost | 12.2 \$ / t cement |
| Carbon cost         | 56.2 \$ / t cement |
| Thermal energy cost | 71.0 \$ / t cement |

| ELECTROCHEMICAL CEMENT                                                                |                                   |
|---------------------------------------------------------------------------------------|-----------------------------------|
| Step 1: CaCO <sub>3</sub> → Ca(OH) <sub>2</sub> (cement electrolyser) CURRENT METRICS |                                   |
| Cell voltage                                                                          | 2.5 V                             |
| Current density                                                                       | 0.3 A / cm <sup>2</sup>           |
| Current efficiency                                                                    | 1 % decimal                       |
| Ca <sup>2+</sup> formation rate                                                       | 0.3 A / cm <sup>2</sup>           |
| Ca <sup>2+</sup> formation rate                                                       | 5.60E+00 mmol / cm <sup>2</sup> h |
| Ca <sup>2+</sup> formation rate                                                       | 5.60E+01 mol / m <sup>2</sup> h   |
| H <sub>2</sub> formation rate (cathode)                                               | 5.60E+00 mmol / cm <sup>2</sup> h |
| CO <sub>2</sub> formation rate (chemical)                                             | 5.60E+00 mmol / cm <sup>2</sup> h |
| O <sub>2</sub> formation rate (anode)                                                 | 2.80E+00 mmol / cm <sup>2</sup> h |

| Electrochemical unit specifications (calculated) |                                                   |
|--------------------------------------------------|---------------------------------------------------|
| Electrode area                                   | 328 m <sup>2</sup>                                |
| Total current                                    | 0.984 MA                                          |
| Power                                            | 2.459 MW                                          |
| Electricity consumption                          | 6.51 GJ / t Ca(OH) <sub>2</sub>                   |
| Electric energy demand                           | 5.59 GJ / t cement                                |
| Emissions from electricity generation            | 271.29 kg CO <sub>2</sub> / t Ca(OH) <sub>2</sub> |
| Emissions from electricity generation            | 233.0 kg CO <sub>2</sub> / t cement               |

| Utilization of O <sub>2</sub> , H <sub>2</sub> , CO <sub>2</sub> |                                 |
|------------------------------------------------------------------|---------------------------------|
| H <sub>2</sub> Heat of combustion (const.)                       | 0.286 MJ / mol                  |
| H <sub>2</sub> /O <sub>2</sub> combustion efficiency             | 0.8831 % decimal                |
| Energy from combustion of H <sub>2</sub> /O <sub>2</sub>         | 3.41 GJ / t Ca(OH) <sub>2</sub> |
| Energy from combustion of H <sub>2</sub> /O <sub>2</sub>         | 2.78 GJ / t cement              |
| Utilization of CO <sub>2</sub> from electrolyser                 | 1 % decimal                     |

| Step 2: Ca(OH) <sub>2</sub> → CaO (dry rotary kiln) |                        |
|-----------------------------------------------------|------------------------|
| Thermal energy (ΔG)                                 | 139.0 KJ / mol (@900K) |
| Thermal energy required (ΔG)                        | 1.61 GJ / t cement     |
| Kiln energy consumption - CaO feed                  | 2.60 GJ / t cement     |
| Thermal energy required for sintering               | 1.17 GJ / t cement     |

| Kiln operation                                |                                      |
|-----------------------------------------------|--------------------------------------|
| Energy consumption - Ca(OH) <sub>2</sub> feed | 2.78 GJ / t cement                   |
| Equivalent electrical energy                  | 5.56 GJ / t cement                   |
| % coke in fuel blend                          | 0.00 % decimal                       |
| % coal in fuel blend                          | 0.00 % decimal                       |
| % oil in fuel blend                           | 0.00 % decimal                       |
| % CH <sub>4</sub> in fuel blend               | 1.00 % decimal                       |
| % H <sub>2</sub> in fuel blend                | 0.00 % decimal                       |
| Fuel mix emission intensity                   | 56.10 kg CO <sub>2</sub> / GJ        |
| Fuel cost                                     | 4.20 \$ / GJ                         |
| Emissions intensity of kiln                   | 156.02 kg CO <sub>2</sub> / t cement |
| Electricity demand for aux. equipment         | 90.00 kWh / t cement                 |
| Electricity demand for aux. equipment         | 0.32 GJ / t cement                   |

| ENERGY DEMAND                       |                   |
|-------------------------------------|-------------------|
| Thermal energy consumption          | 0.0 GJ / t cement |
| Electric energy consumption         | 5.9 GJ / t cement |
| Total energy consumption (thermal)  | 3.0 GJ / t cement |
| Total energy consumption (electric) | 5.9 GJ / t cement |

| CO <sub>2</sub> EMISSIONS                       |                                      |
|-------------------------------------------------|--------------------------------------|
| Electricity generation for electrolyser         | 233.00 kg CO <sub>2</sub> / t cement |
| CO <sub>2</sub> released from CaCO <sub>3</sub> | 0.00 kg CO <sub>2</sub> / t cement   |
| Kiln fuel use                                   | 0.00 kg CO <sub>2</sub> / t cement   |
| Electricity for aux. equipment                  | 13.5 kg CO <sub>2</sub> / t cement   |
| Total emissions                                 | 246.50 kg CO <sub>2</sub> / t cement |

| OPERATING COSTS     |                    |
|---------------------|--------------------|
| Electricity cost    | 49.3 \$ / t cement |
| Thermal energy cost | 0.0 \$ / t cement  |
| Carbon cost         | 21.0 \$ / t cement |
| Total energy cost   | 70.3 \$ / t cement |

| Fuel specifications |                |                          |            |
|---------------------|----------------|--------------------------|------------|
| Fuel                | Emissions (kg) | Net calorific value (MJ) | Cost (CAD) |
| Coke (petroleum)    | 92.8           | 31.44                    | 2          |
| Hard coal           | 96             | 26.62                    | 2.05       |
| Oil                 | 74             | 41                       | 21.74      |
| Natural gas         | 56.1           | 47.1                     | 4.2        |
| H <sub>2</sub>      | 0.005          | 120                      | 14         |

| Kiln fuel use in Canada |                |
|-------------------------|----------------|
| Coke (petroleum)        | 0.25 % decimal |
| Hard coal               | 0.52 % decimal |
| Oil                     | 0.05 % decimal |
| Natural gas             | 0.18 % decimal |
| H <sub>2</sub>          | 1.00 Total     |
